# Supplementary material for: Visual and tactile motion cues enhance the categorisation of novel object shapes
Source: Research Square preprint supplement (doi:10.21203/rs.3.rs-7848074/v1), 2025-11-05
Supplement: Supplementary file 1 [file c10ad81866e86d78781c2174.docx]

# **Visual and tactile motion cues enhance the categorisation of novel object shapes**

Martina A. Seveso1, Rebecca J. Hirst1, Alan O’Dowd1, Ivan Camponagara2 and Fiona N. Newell1

1School of Psychology and Institute of Neuroscience, Trinity College Dublin, Ireland. 
2Department of Psychology, College of Natural and Health Sciences, Zayed University, Abu Dhabi, United Arab Emirates.

# **Author Note**

Correspondence concerning this article should be addressed to Martina A. Seveso, Institute of Neuroscience, Trinity College Dublin, Dublin, Ireland. Email: [sevesom@tcd.ie](mailto:sevesom@tcd.ie), ORCID: <https://orcid.org/0000-0001-6566-4578>.

**Supplementary Information**

***Table S1*** *– Synchrony assessment task analysis and results across Experiments 1A,1B,2A,2B,3.*

To assess perceived synchrony across three stimulus onset asynchronies (SOAs: 0 ms, 150 ms, 300 ms), we conducted separate Welch ANOVAs for each experiment. Assumption checks revealed violations of normality and homogeneity of variance in all experiments except Experiment 3 (see Table below). Accordingly, Welch ANOVA was used due to its robustness to such violations.

| **Experiment** | **Shapiro–Wilk (Normality)** | **Levene’s Test (Homogeneity)** | **Welch ANOVA (*F*, df)** | ***p*** | **Significant Pairwise Differences** | **Figure** |
| --- | --- | --- | --- | --- | --- | --- |
| *Exp. 1A* | W = 0.910, p < 0.001 | F (2, 483) = 3.85, *p =* 0.022 | 6.12 (2, 86.87) | 0.003 | 0ms –150 ms (*p* = 0.016)  0ms –300 ms (*p* = 0.005)  150ms –300 (*p = 0.70*, ns) | S5A |
| *Exp. 1B* | W = 0.937, p < 0.001 | F (2, 346) = 4.72, *p =* 0.009 | 13.54 (2, 61.83) | <0.001 | 0ms –150 ms (*p* < .0001)  0ms –300 ms (*p* = 0.0003)  150ms –300ms (*p = 0.84*, ns) | S5B |
| *Exp. 2A* | W = 0.930, p < 0.001 | F (2, 343) = 8.17, *p* < 0.001 | 5.80 (2, 63.88) | 0.005 | 0ms –300 ms (*p* =0 .003)  0ms –150 ms (*p* =0 .078, ns)  150ms –300ms (*p = 0.46*, ns) | S5C |
| *Exp. 2B* | W = 0.923, p < 0.001 | F (2, 344) = 6.39, *p =* 0.002 | 4.82 (2, 63.97) | 0.011 | 0ms –150 ms (*p* = 0.024)  0ms –300 ms (*p* = 0.025)  150ms –300ms (*p = 0.99*, ns) | S5D |
| *Exp. 3* | W = 0.933, p < 0.001 | F (2, 345) = 2.53, *p* = .080 (ns) | 5.62 (2, 61.76) | 0.006 | 0ms –150 ms (*p* = 0.025)  0ms –300 ms (*p* = 0.006)  150ms –300ms (*p = 0.80*, ns) | S5E |

***Figure S1*** *– Predicted categorisation accuracy (on the logit scale) and odds ratios for accuracy by Cue Condition and Exemplar Type for the Experiment 1A and 1B.*


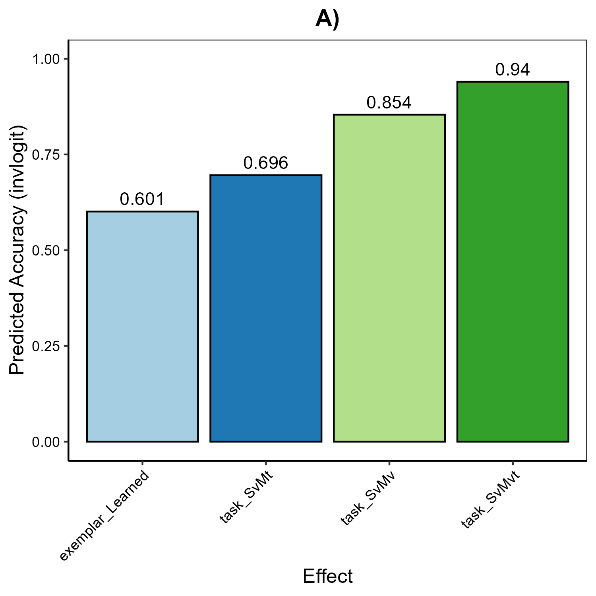

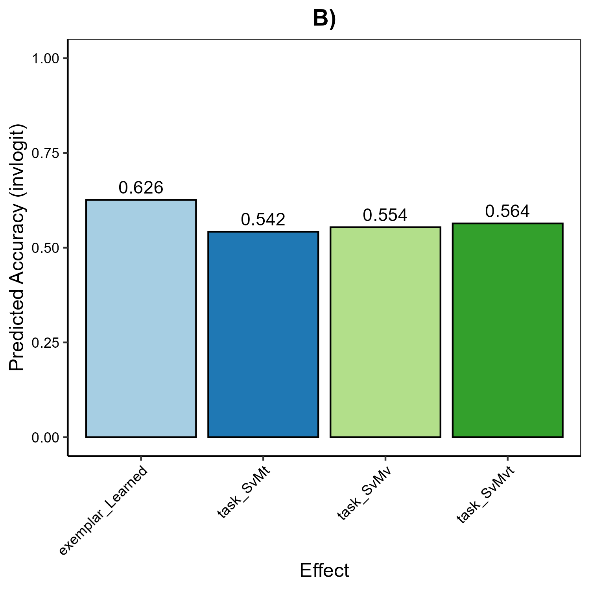


*Figure S1.1* - Predicted categorisation accuracy by cue condition and exemplar type for Experiment 1A (Panel A) and Experiment 1B (Panel B), based on a binomial mixed-effects model. Accuracy is shown separately for learned and novel exemplars across four cue conditions (Sv, SvMv, SvMt and SvMvt). In the blocked presentation (1A), accuracy increases with the number of cues, indicating a multisensory benefit. In the interleaved presentation (1B), overall accuracy is lower and shows minimal variation across conditions. Points represent model-estimated accuracy with 95% confidence intervals.

1. **B)**

*
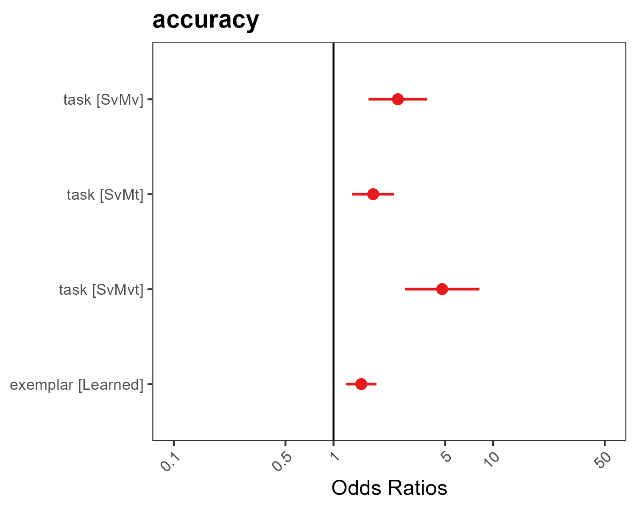
*
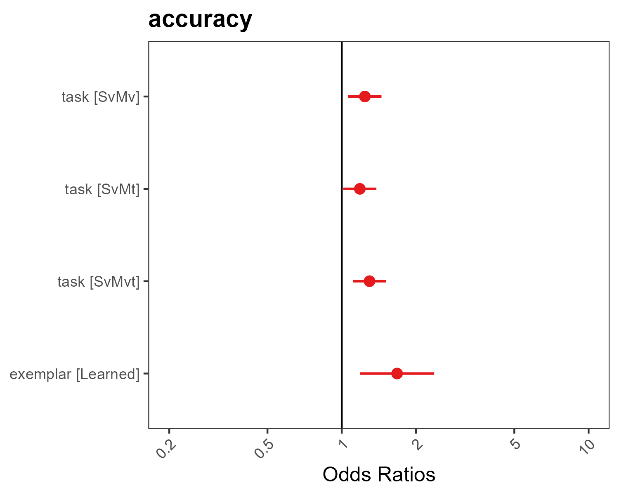


*Figure S1.2 -* Odds ratios for categorisation accuracy across cue conditions and exemplar types for Experiment 1A (Panel A) and Experiment 1B (Panel B), derived from a binomial mixed-effects model. Points indicate estimated odds ratios; horizontal lines show 95% confidence intervals. The vertical reference line at OR = 1 reflects chance-level performance. In the blocked condition (1a), odds of correct categorisation increase with additional cues. In the interleaved condition (1b), cue effects are attenuated.

***Figure S2*** *– Predicted categorisation accuracy (on the logit scale) and odds ratios for accuracy by Cue Condition and Exemplar Type for the Experiment 2A and 2B.*


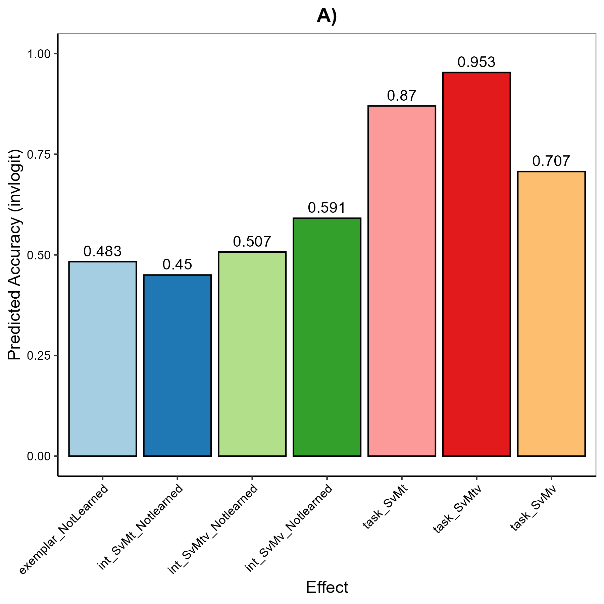
*
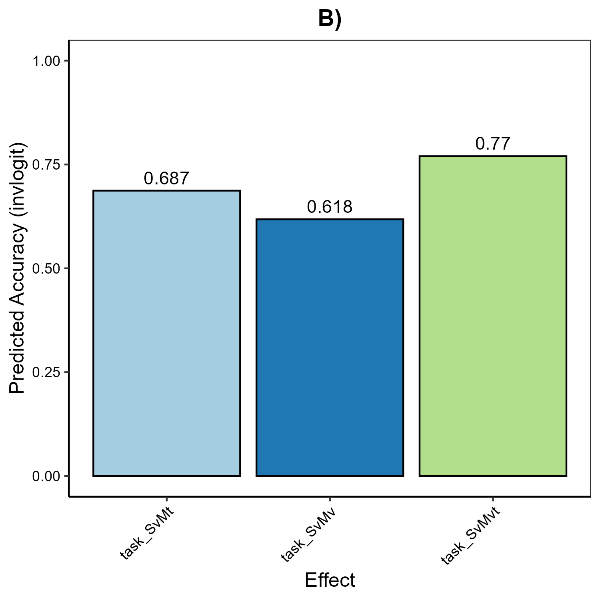
*

*Figure S2.1-* Predicted categorisation accuracy by cue condition and exemplar type for Experiment 2A (Panel A, blocked presentation) and Experiment 2B (Panel B, interleaved presentation), based on a binomial mixed-effects model. In Experiment 2A, accuracy increases with additional predictive cues, with the highest accuracy observed in the SvMvt condition, while performance in the Sv condition is substantially lower, particularly for novel exemplars. In Experiment 2B, accuracy also improves across conditions but shows reduced sensitivity to cue informativeness, suggesting that interleaved presentation may limit the benefit of multisensory integration.

1. **B)**

*
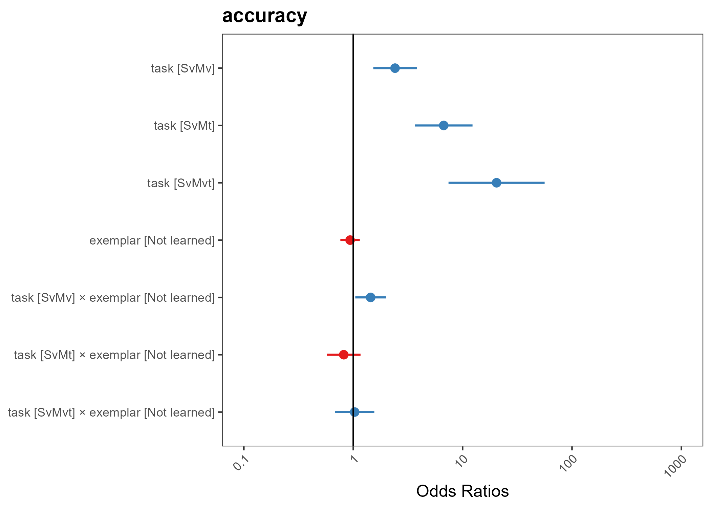
* ***
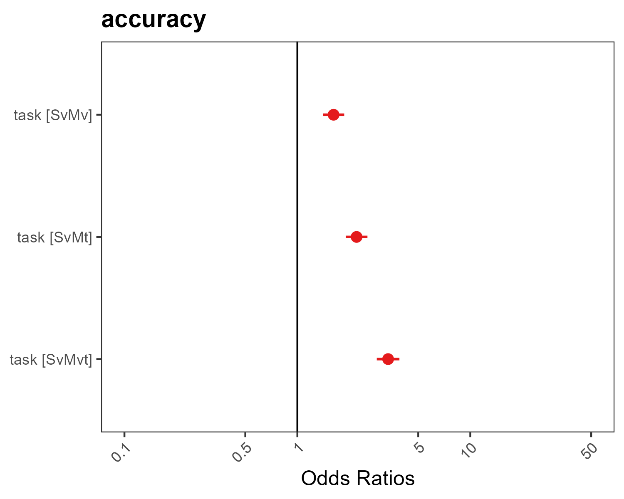
***

*Figure S2.2 -* Odds ratios for categorisation accuracy across cue conditions and exemplar types in Experiment 2A (Panel A) and Experiment 2B(Panel B), derived from binomial mixed-effects models. Each point represents the estimated odds ratio for a given condition, and horizontal lines indicate 95% confidence intervals. The vertical dashed line at OR = 1 marks the reference value (no difference). In Experiment 2A, odds ratios increase with additional cues, especially for novel exemplars. In Experiment 2B, cue effects are present but attenuated.

***
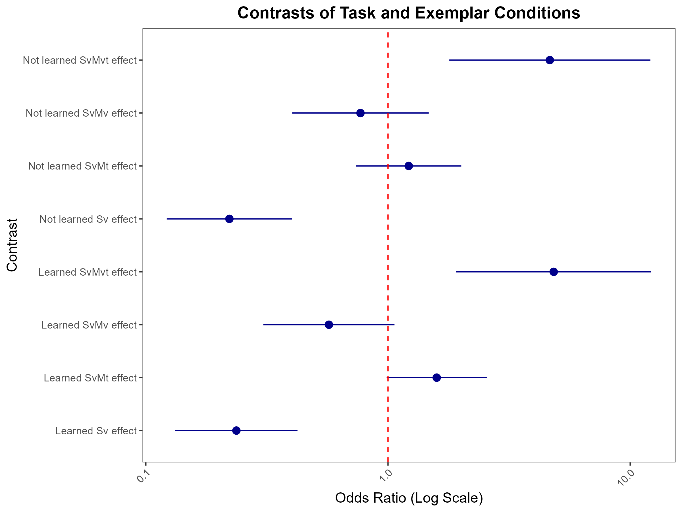
***

*Figure S2.3* - Estimated odds ratios for contrasts between cue conditions and exemplar types in Experiment 2A, plotted on a logarithmic scale. Each point reflects the odds ratio for a specific contrast comparing categorisation accuracy across cue and exemplar combinations (Sv, SvMv, SvMt and SvMvt), with horizontal lines denoting 95% confidence intervals. The red dashed line at OR = 1 represents the baseline (no difference). Contrasts are displayed separately for learned and novel exemplars. Odds ratios above 1 indicate improved performance relative to baseline; confidence intervals not crossing the reference line suggest statistically significant effects.

***Figure S3*** *–Predicted categorisation accuracy (on the logit scale) and odds ratios for accuracy by Cue Condition and Exemplar Type for Experiment 3.*

1. **B) C)**

*
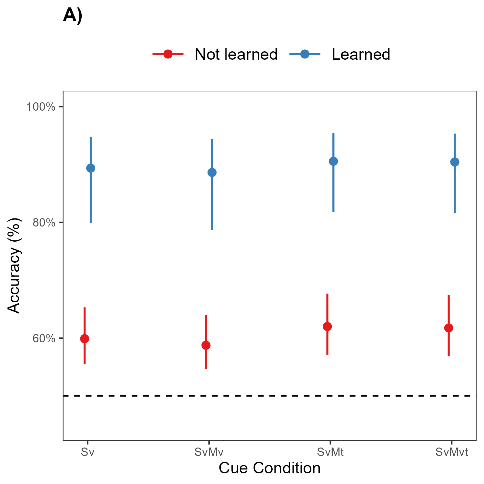

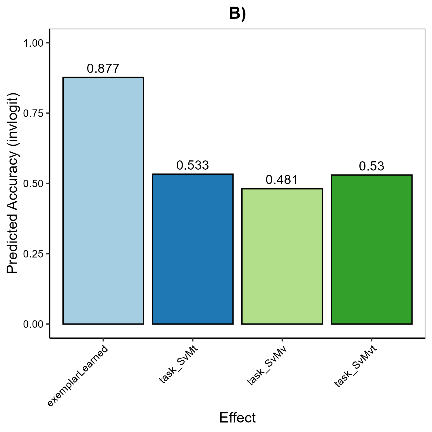
* ***
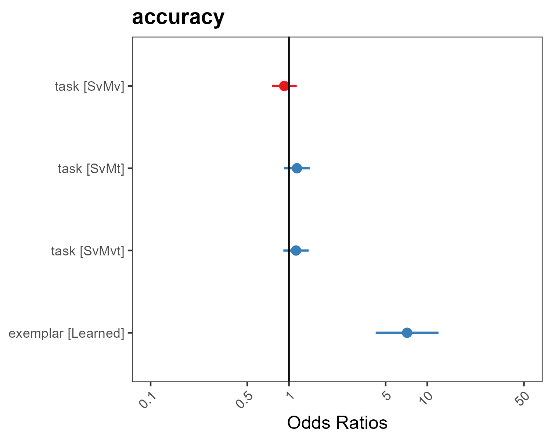
***

Predicted categorisation accuracy by cue condition (Sv, SvMv, SvMt and SvMvt) and exemplar type (learned vs. novel) in Experiment 3. Panel A shows accuracy estimates (%) indicating consistently high performance for learned exemplars across all conditions, with lower and less responsive accuracy for novel exemplars, suggesting limited generalisation and minimal benefit from untrained cues. Panel B presents accuracy on the logit scale, showing that cue condition had little impact on performance, particularly for novel exemplars. Panel C displays odds ratios with 95% confidence intervals from the mixed-effects model; values above 1 reflect improved accuracy relative to baseline, with the vertical line at OR = 1 indicating no effect.

| ***Table S2***  *Model syntax and key for the final models fit across Experiments 1A, 1B, 2A, 2B and 3.* | |
| --- | --- |
| **Model terms** | **Key** |
| **Experiment 1A** | |
| Model1<- glmer(accuracy ~ 1 +  task +  exemplar +  (1 + task + exemplar | ID), | *Accuracy performance (*binomial*; 1,0)*  *Cue condition main effect*  *Exemplar type main effect*  *Random effects; random intercept + random Linear trial slope* |
| data = acc_data,  family = binomial(link = "logit"),  control = glmerControl(optimizer = "bobyqa",  optCtrl = list(maxfun = 2e5))) | *Data frame + model optimiser.* |
| **Experiment 1B** | |
| Model1<- glmer(accuracy ~ 1 +  task +  exemplar +  (1 + exemplar | ID), | *Accuracy performance (*binomial*; 1,0)*  *Cue condition main effect*  *Exemplar type main effect*  *Random effects; random intercept + random Linear trial slope* |
| data = acc_data,  family = binomial(link = "logit"),  control = glmerControl(optimizer = "bobyqa",  optCtrl = list(maxfun = 2e5))) | *Data frame + model optimiser.* |
| **Experiment 2A** | |
| Model2<- glmer(accuracy ~ 1 +  task +  exemplar +  task:exemplar +  (1 + task | ID), | *Accuracy performance (*binomial*; 1,0)*  *Cue condition main effect*  *Exemplar type main effect*  *Cue condition * Exemplar type interaction effect*  *Random effects; random intercept + random Linear trial slope* |
| data = acc_data,  family = binomial(link = "logit"),  control = glmerControl(optimizer = "bobyqa",  optCtrl = list(maxfun = 2e5))) | *Data frame + model optimiser.* |
| **Experiment 2B** | |
| Model4<- glmer(accuracy ~ 1 +  task +  (1 | ID), | *Accuracy performance (*binomial*; 1,0)*  *Cue condition main effect*  *Random effects* |
| data = acc_data,  family = binomial(link = "logit"),  control = glmerControl(optimizer = "bobyqa",  optCtrl = list(maxfun = 2e5))) | *Data frame + model optimiser.* |
| **Experiment 3** | |
| Model14 <- glmer(accuracy ~ 0 +  task +  exemplar +  (1+ exemplar | ID), | *Accuracy performance (*binomial*; 1,0)*  *Cue condition main effect*  *Exemplar type main effect*  *Random effects; random intercept + random Linear trial slope* |
| data = acc_data,  family = binomial(link = "logit"),  control = glmerControl(optimizer = "bobyqa",  optCtrl = list(maxfun = 2e5))) | *Data frame + model optimiser.* |

| **Table S3**  *Model fit indices across models in Experiments 1A, 1B, 2A, 2B and 3. The final model selected is in bold.* | | | |
| --- | --- | --- | --- |
| **Experiment 1A** | | | |
|  | **Likelihood ratio test** | **AIC** | **BIC** |
| **Model 1 (without interaction)** |  | **9712.9** | **9857.0** |
| Model 2 (with interaction) | χ²(3) = 6.40, p = 0.094 | 9712.5 | 9878.2 |
| **Model 1** | | | |
| **R2 (conditional)** | **R2 marginal** | **ICC** | **RMSE** |
| 0.449 (44.9%) | 0.060 (6.0%) | 0.389 | 0.393 |
| **Experiment 1B** | | | |
|  | **Likelihood ratio test** | **AIC** | **BIC** |
| **Model 1 (without interaction)** |  | **7686.8** | **7741.3** |
| Model 2 (with interaction) | χ²(3) = 1.47, p = 0.689 | 7766.3 | 7766.3 |
| **Model 1** | | | |
| **R2 (conditional)** | **R2 marginal** | **ICC** | **RMSE** |
| 0.327 (32.7%) | 0.015 (1.5%) | 0.31 | 0.440 |
| **Experiment 2A** | | | |
|  | **Likelihood ratio test** | **AIC** | **BIC** |
| Model 1 (without interaction) |  | 6273.4 | 6376.7 |
| **Model 2 (with interaction)** | **χ²(3) = 9.09, p = .028** | **6270.3** | **6394.2** |
| **Model 2** | | | |
| **R2 (conditional)** | **R2 marginal** | **ICC** | **RMSE** |
| 0.561 (56.1%) | 0.165 (16.5%) | 0.396 | 0.367 |
| **Experiment 2B** | | | |
|  | **Likelihood ratio test** | **AIC** | **BIC** |
| Model 2 (with interaction) | χ²(3) = 0.733, p = 0.866 | 8345.8 | 8407.3 |
| Model 1 (without interaction) |  | 8340.5 | 8381.5 |
| Model 3 (no interaction – exemplar main effect) | χ²(1) = 0.953, p = 0.329 | 8339.5 | 8373.6 |
| **Model 4 (no interaction – task main effect)** | **χ²(3) = 276.7, p < 0.001** | **8611.2** | **8631.7** |
| **Model 4** | | | |
| **R2 (conditional)** | **R2 marginal** | **ICC** | **RMSE** |
| 0.165 (16.5%) | 0.49 (49%) | 0.114 | 0.455 |
| **Experiment 3** | | | |
|  | **Likelihood ratio test** | **AIC** | **BIC** |
| Model 2 (with interaction) | χ²(3) = 2.75, p =0 .432 | 4537.7 | 4613.1 |
| Model 1 (without interaction) |  | 4534.5 | 4589.3 |
| Model 3 (no interaction – task main effect) | χ²(3) = 5.251, p = 0.154 | 4533.7 | 4568.0 |
| **Model 4 (no interaction – exemplar main effect)** | **χ²(1) = 34.95, p < 0.001** | **4567.4** | **4615.4** |
| **Model 4** | | | |
| **R2 (conditional)** | **R2 marginal** | **ICC** | **RMSE** |
| 0.121 (12.1%) | 0.551 (55.1%) | 0.431 | 0.312 |

| **Table S4**  *Predicted mean accuracy values per cue condition and exemplar type during test (95% confidence intervals).* | |
| --- | --- |
| **Experiment 1A** | |
| **Cue condition** |  |
| Sv | 0.65 (0.56, 0.72) |
| SvMv | 0.82 (0.74, 0.88) |
| SvMt | 0.76 (0.70, 0.82) |
| SvMvt | 0.90 (0.83, 0.94) |
| **Exemplar type** |  |
| Learned | 0.82 (0.75, 0.88) |
| Not learned | 0.75 (0.69, 0.81) |
| **Experiment 1B** | |
| **Cue condition** |  |
| Sv | 0.69 (0.59, 0.77) |
| SvMv | 0.73 (0.64, 0.80) |
| SvMt | 0.72 (0.63, 0.80) |
| SvMvt | 0.74 (0.65, 0.81) |
| **Exemplar type** |  |
| Learned | 0.76 (0.65, 0.84) |
| Not learned | 0.65 (0.59, 0.70) |
| **Experiment 2A** | | |
| **Learned Exemplar x Cue condition** | |  |
| Sv | | 0.61 (0.56, 0.66) |
| SvMv | | 0.79 (0.69, 0.86) |
| SvMt | | 0.91 (0.85, 0.95) |
| SvMvt | | 0.97 (0.92, 0.99) |
| **Not Learned Exemplar x Cue condition** | |  |
| Sv | | 0.60 (0.54, 0.65) |
| SvMv | | 0.84 (0.75, 0.90) |
| SvMt | | 0.89 (0.89, 0.94) |
| SvMvt | | 0.97 (0.92, 0.99) |
| **Experiment 2B** | | |
| **Cue condition** | |  |
| Sv | | 0.52 (0.45, 0.58) |
| SvMv | | 0.63 (0.57, 0.69) |
| SvMt | | 0.70 (0.65, 0.75) |
| SvMvt | | 0.78 (0.73, 0.82) |
| **Experiment 3** | |
| **Exemplar type** |  |
| Learned  Not learned | 0.96 (0.91, 0.98)  0.76 (0.70, 0.81) |

***F*igure S4.1-** *Beta coefficients and 95% confidence intervals for the results of Experiment 1A. From left to right: Model with two-way interactions, model with main effects only.*

*
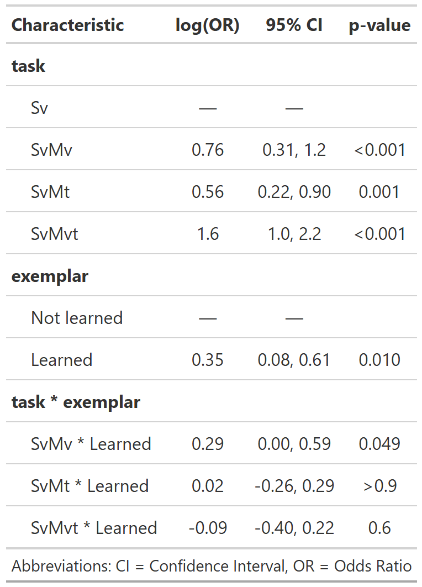

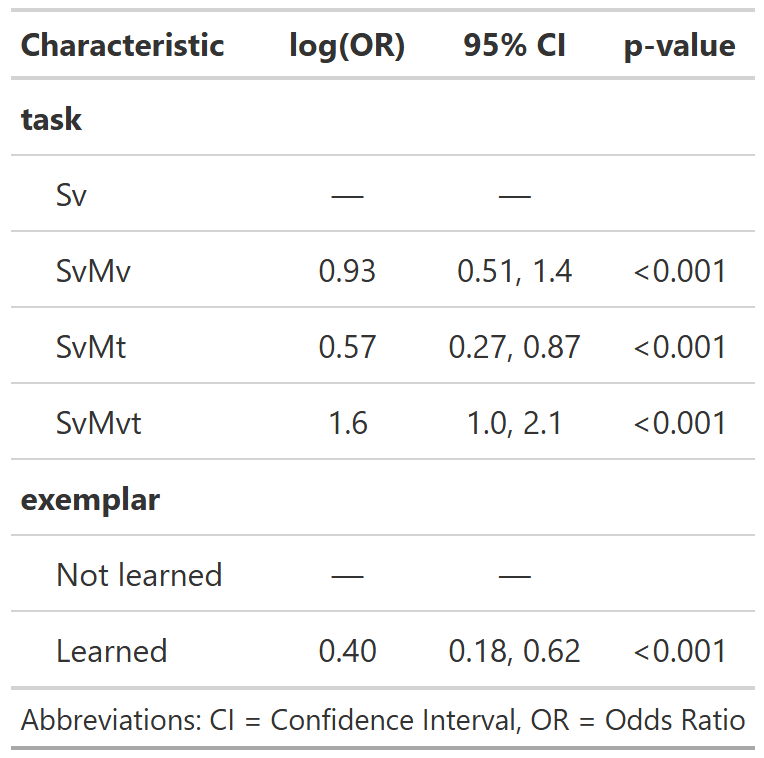
*

**Figure S4.2 -** *Beta coefficients and 95% confidence intervals for the results of Experiment 1B. From left to right: Model with two-way interactions, model with main effects only.*


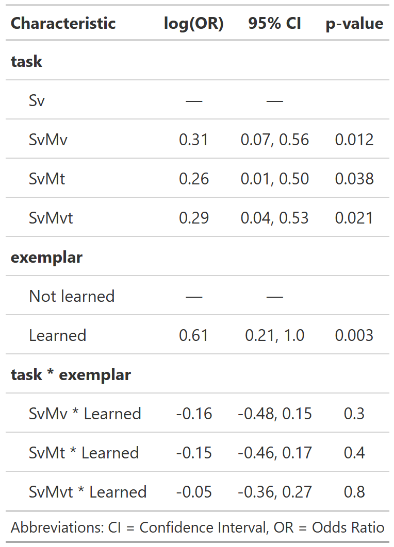

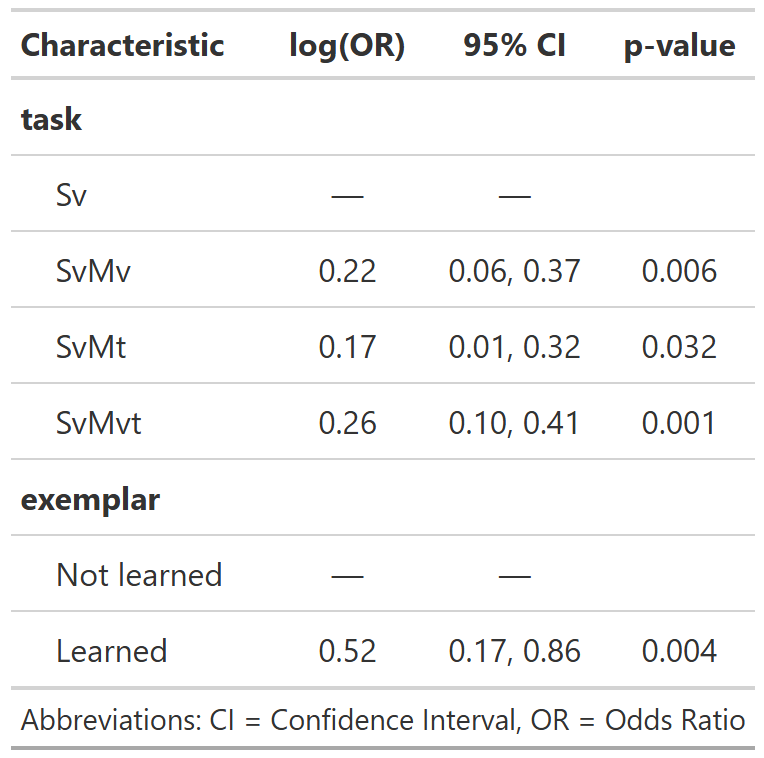


**Figure S5.1 -** *Beta coefficients and 95% confidence intervals for the results of Experiment 2A. From left to right: Model with two-way interactions, model with main effects only.*


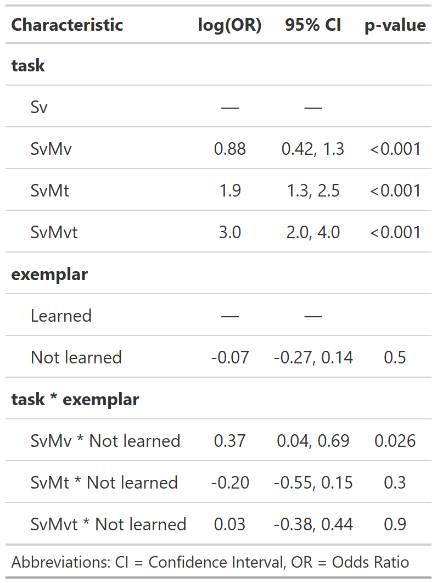

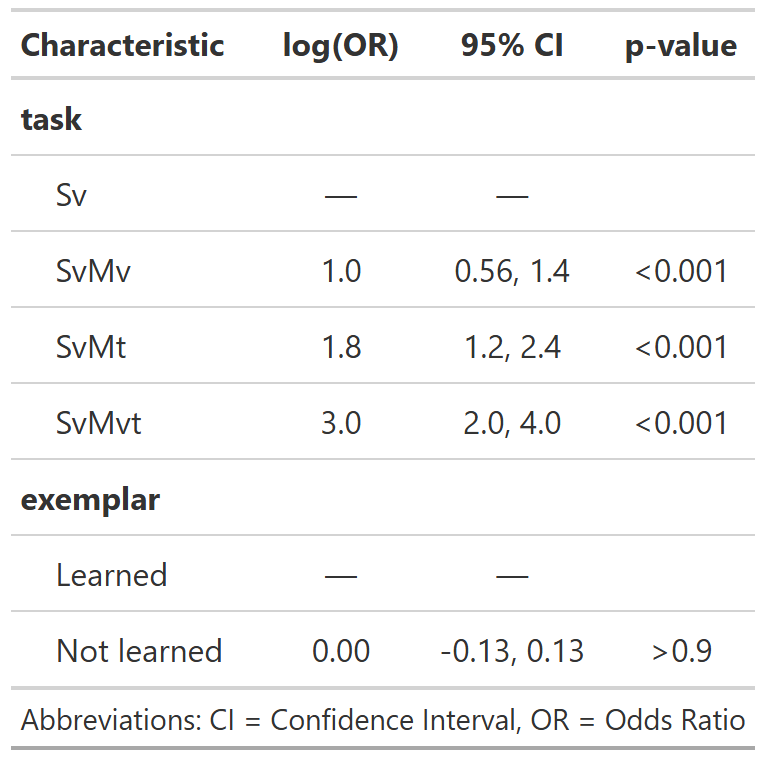


**Figure S5.2 -** *Beta coefficients and 95% confidence intervals for the results of Experiment 2B. From left to right: Model with two-way interactions, model with main effects only.*

*
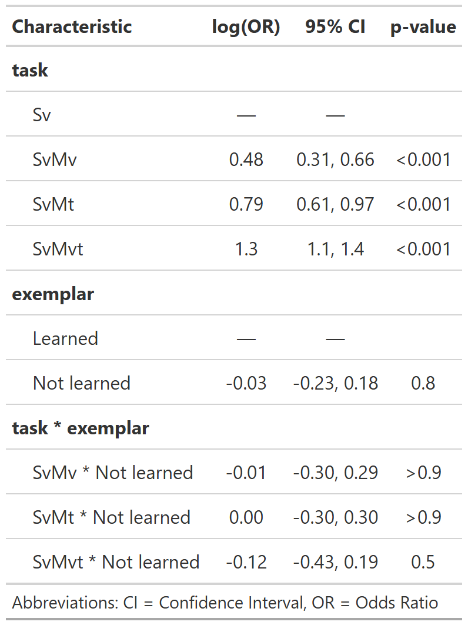

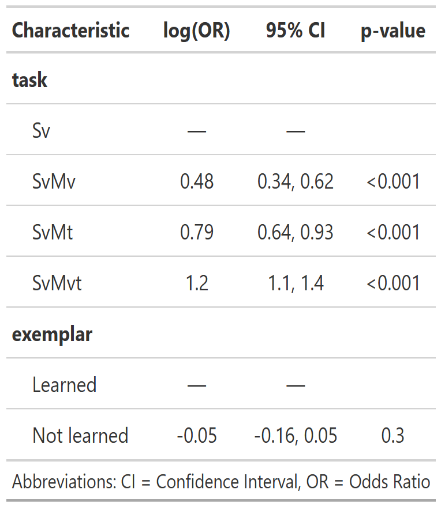

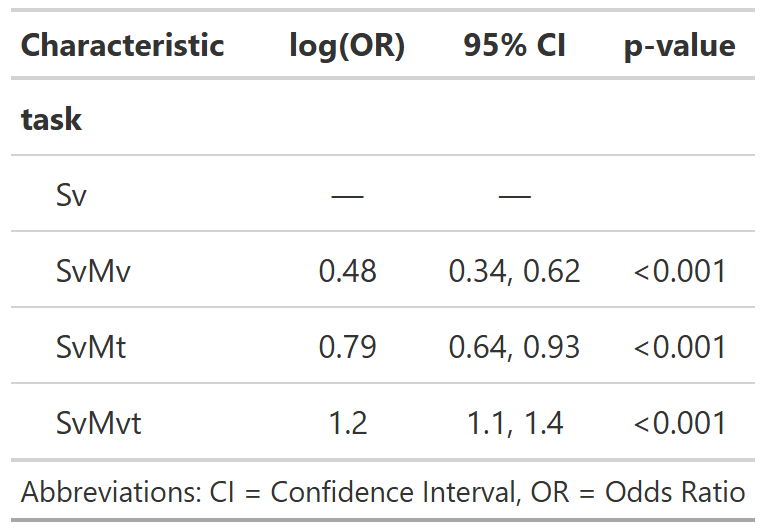
*

**Figure S6 -** *Beta coefficients and 95% confidence intervals for the results of Experiment 3. From left to right: From left to right: Model with two-way interactions, model with main effects only.*

*
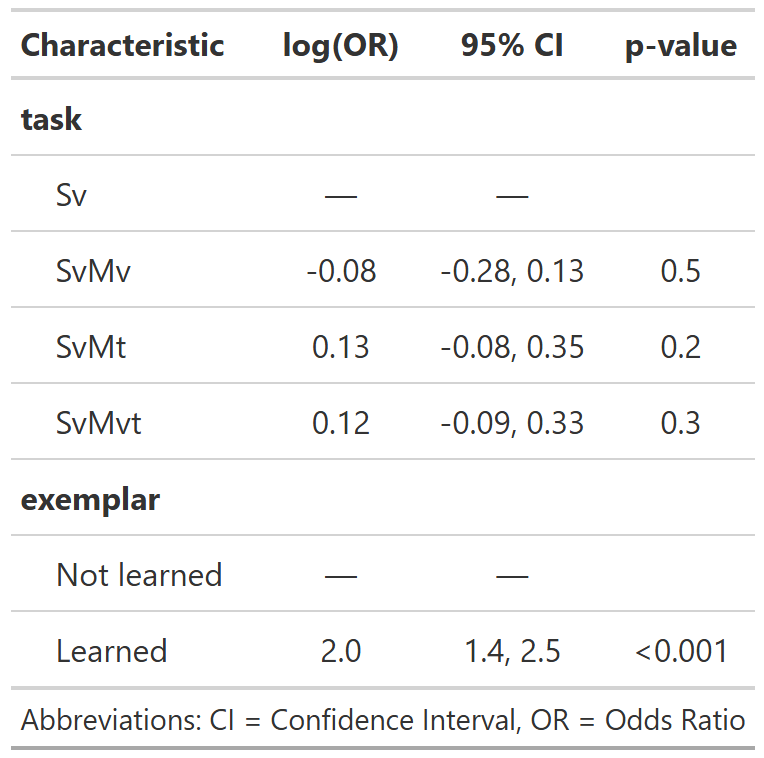

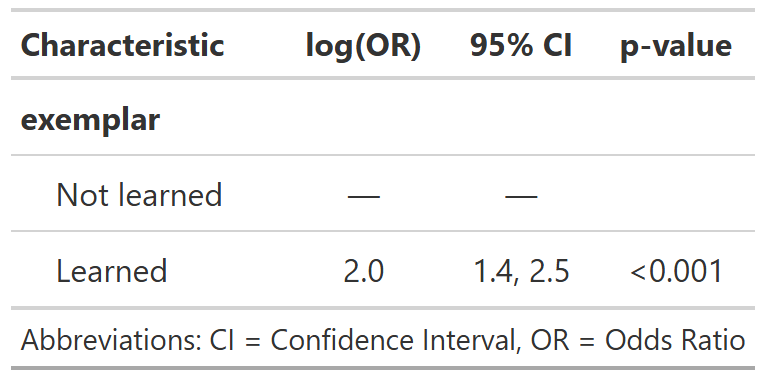
*
